# Supplementary material for: Vertical distribution of planktic foraminifera through an oxygen minimum zone: how assemblages and test morphology reflect oxygen concentrations
Source: Copernicus journal article supplement (doi:10.5194/bg-18-977-2021), 2021-02-10
Supplement: Supplementary file 1 [file bg-18-977-2021-supplement.zip]

Archive with 3 entries (3 files):
- SupplementalTable1.xls
- bg-18-977-2021-supplement-title-page.pdf
- Supplement.pdf
