# Supplementary material for: Vertical distribution of planktic foraminifera through an oxygen minimum zone: how assemblages and test morphology reflect oxygen concentrations
Source: Copernicus journal article supplement (doi:10.5194/bg-18-977-2021), 2021-02-10
Supplement: Supplementary file 1 [file bg-18-977-2021-supplement.zip › bg-18-977-2021-supplement-title-page.pdf]

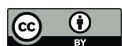

## *Supplement of*

# **Vertical distribution of planktic foraminifera through an oxygen minimum zone: how assemblages and test morphology reflect oxygen concentrations**

**Catherine V. Davis et al.**

*Correspondence to:* Catherine V. Davis ([catherine.davis@yale.edu](mailto:catherine.davis@yale.edu))

- [bg-18-977-2021-supplement-title-page.pdf](#)
- [Supplement.pdf](#)
- [SupplementalTable1.xls](#)

The copyright of individual parts of the supplement might differ from the CC BY 4.0 License.
