# Supplementary material for: Vertical distribution of planktic foraminifera through an oxygen minimum zone: how assemblages and test morphology reflect oxygen concentrations
Source: Copernicus journal article supplement (doi:10.5194/bg-18-977-2021), 2021-02-10
Supplement: Supplementary file 1 [file bg-18-977-2021-supplement.zip › Supplement.pdf]

**Supplement to: Vertical distribution of planktic foraminifera through an Oxygen  
Minimum Zone: how assemblages and test morphology reflect oxygen  
concentrations**

Catherine V. Davis<sup>1</sup>, Karen Wishner<sup>2</sup>, Willem Renema<sup>3,4</sup> & Pincelli M. Hull<sup>1,5</sup>

<sup>1</sup>Department of Earth and Planetary Sciences, Yale University, New Haven CT 06511,  
USA

<sup>2</sup>Graduate School of Oceanography, University of Rhode Island, Narragansett, RI 02882,  
USA

<sup>3</sup>Department of Ecosystem & Landscape Dynamics, Institute for Biodiversity &  
Ecosystem Dynamics (IBED), University of Amsterdam, Amsterdam, the Netherlands

<sup>4</sup>Naturalis Biodiversity Center, Leiden, the Netherlands

<sup>5</sup>Peabody Museum of Natural History, Yale University, New Haven 06511, USA

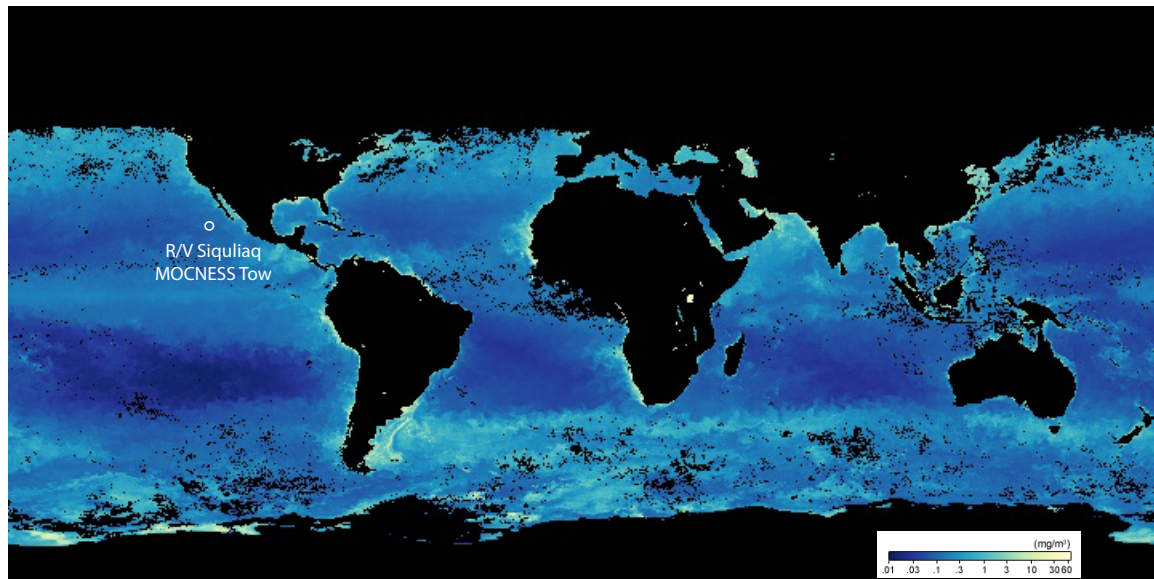

**Figure S1.** Site of MOCNESS tows through the ETNP OMZ mapped over global Chlorophyll distribution from January 2017. Data and imagery from AQUA MODIS (NASA, Access date: 06/01/2020).

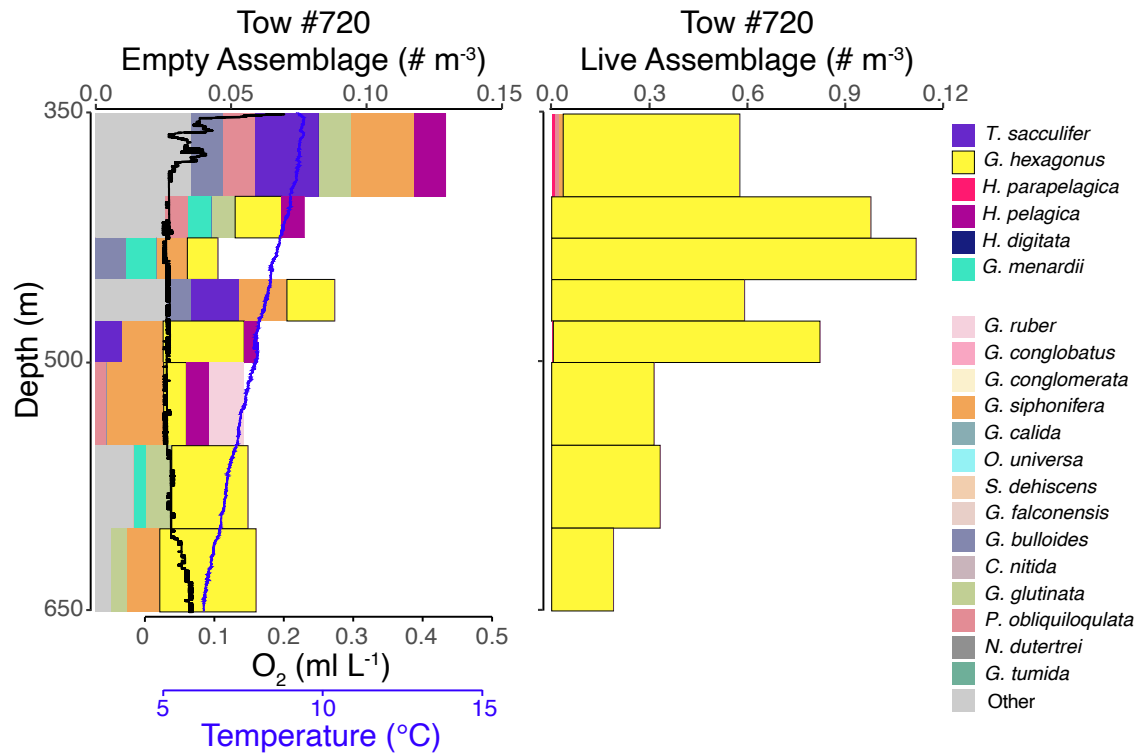

**Figure S2.** Vertical profiles of the empty assemblage, dissolved oxygen, and temperature (left) and live foraminiferal assemblage (right) from tow #720 (0-650 m). Each color represents a different species (see legend). Abundance axes vary between panels.

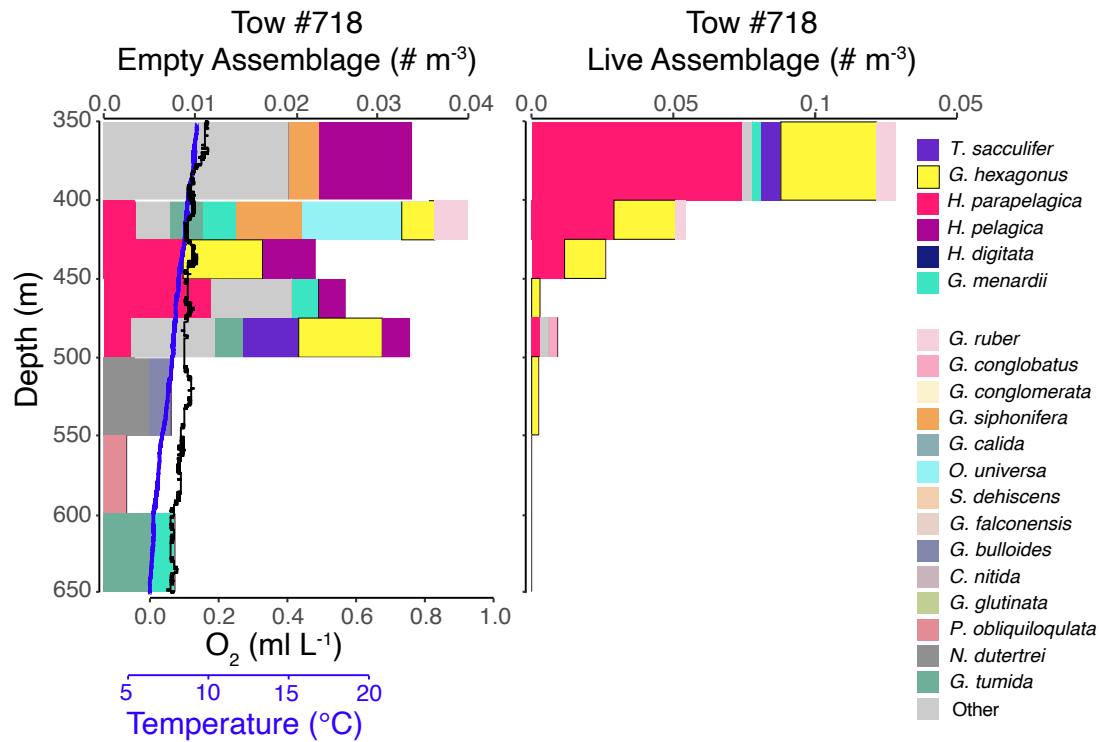

**Figure S3.** Vertical profiles of the empty test foraminiferal assemblage, dissolved oxygen, and temperature (left) and live foraminiferal assemblage (right) from tow #718 (0-650 m). Each color represents a different species (see legend). Abundance axes vary between panels.

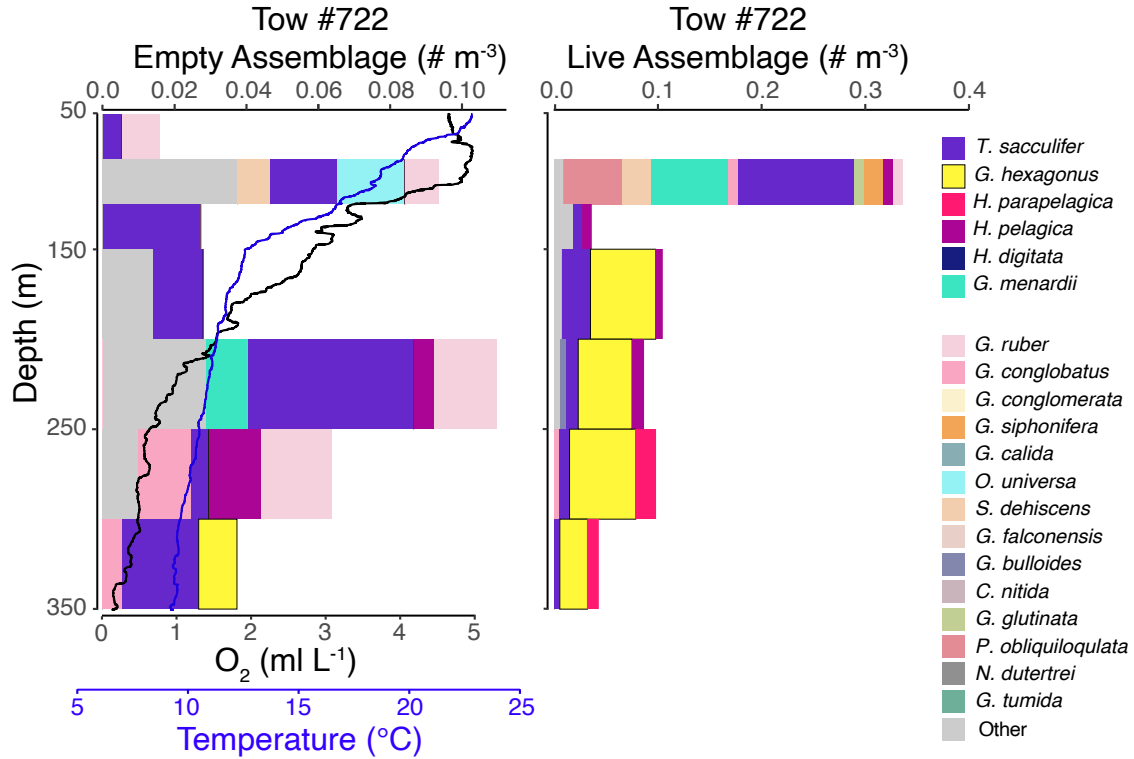

**Figure S4.** Vertical profiles of the empty assemblage, dissolved oxygen, and temperature (left) and live foraminiferal assemblage (right) from tow #7202 (0-350 m). Each color represents a different species (see legend). Abundance axes vary between panels.

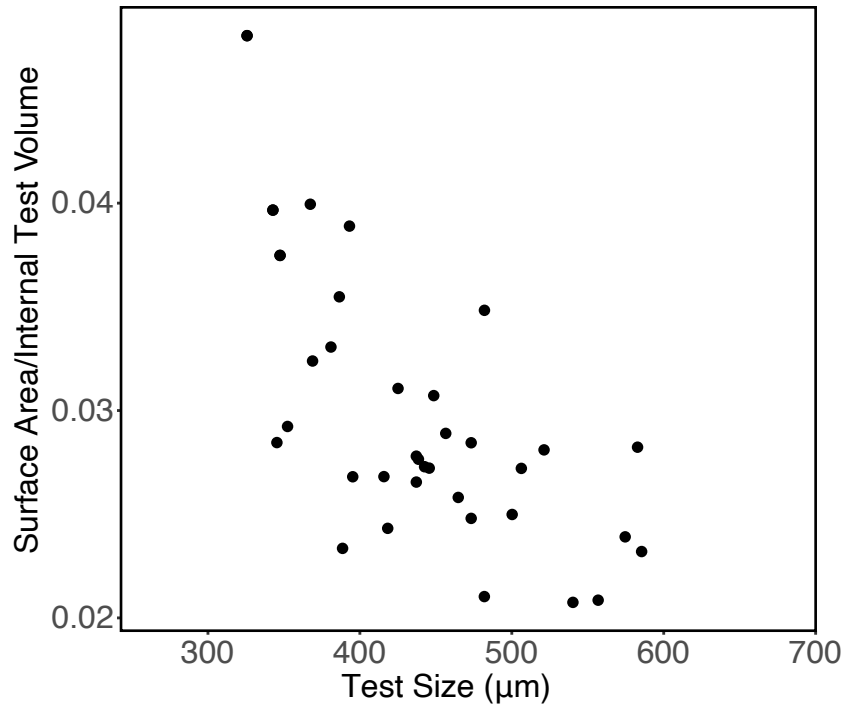

**Figure S5.** The ratio of surface area to internal test volume compared with test size (measured along the longest axis), showing a decrease in surface/volume ratio with increasing test size.

### References

NASA Goddard Space Flight Center, Ocean Ecology Laboratory, Ocean Biology Processing Group. Moderate-resolution Imaging Spectroradiometer (MODIS) Terra Data, NASA OB.DAAC, Greenbelt, MD, USA, accessed on 06/01/2020.
