# Supplementary material for: Vertical distribution of planktic foraminifera through an oxygen minimum zone: how assemblages and test morphology reflect oxygen concentrations
Source: Copernicus journal article supplement (doi:10.5194/bg-18-977-2021), 2021-02-10
Supplement: Supplementary file 1 [file bg-18-977-2021-supplement.zip › SupplementalTable1.xls]

## Sheet: SupplementTable1.csv
Tow	Net	Cytoplasm Present	Total Volume Sampled (m3)	Starting Depth (mbsl)	Ending Depth (mbsl)	G. ruber ind m-3 (Split Corrected)	H. parapelagica ind m-3 (Split Corrected)	H. pelagica ind m-3 (Split Corrected)	G. hexagonus ind m-3 (Split Corrected)	O. universa ind m-3 (Split Corrected)	G. siphonifera ind m-3 (Split Corrected)	G. glutinata ind m-3 (Split Corrected)	H. digitata ind m-3 (Split Corrected)	G. sacculifer ind m-3 (Split Corrected)	G. conglobatus ind m-3 (Split Corrected)	G. menardii ind m-3 (Split Corrected)	S. dehiscens ind m-3 (Split Corrected)	G. conglomorata ind m-3 (Split Corrected)	C. nitida ind m-3 (Split Corrected)	G. calida ind m-3 (Split Corrected)	P. obliqueloquolata ind m-3 (Split Corrected)	G. falconensis ind m-3 (Split Corrected)	G. bulloides ind m-3 (Split Corrected)	N. dutertrei ind m-3 (Split Corrected)	G. adamsi ind m-3 (Split Corrected)	G. tumida ind m-3 (Split Corrected)	Unidentified ind m-3 (Split Corrected)
716	2	Y	905	800	700	0	0	0	0.0331492	0	0	0	0	0	0	0	0	0	0	0	0	0	0	0	0	0	0
716	3	Y	1069	700	600	0	0	0	0.15435	0	0	0	0	0	0	0	0	0	0	0	0	0	0.00467727	0	0	0	0
716	4	Y	956	600	500	0	0.00523013	0	0.0732218	0	0	0	0	0	0	0	0	0	0	0	0	0	0	0	0	0	0
716	5	Y	990	500	400	0	0.010101	0	0.222222	0	0.00505051	0	0	0	0	0	0	0	0	0	0	0	0	0	0	0	0
716	6	Y	827	400	300	0	0.0181378	0	0.302297	0	0	0.00604595	0	0	0	0	0	0	0	0	0	0	0	0	0	0	0
716	8	Y	1041	200	100	0	0	0.0192123	0.144092	0.00480307	0	0.0144092	0	0.00480307	0	0	0	0	0	0	0	0	0	0	0	0	0.00480307
716	9	Y	1971	100	0	0	0	0.00390274	0.00390274	0.00390274	0	0	0	0.00780549	0	0.0195137	0	0	0.00390274	0	0.00390274	0	0	0	0	0	0.0117082
718	3	Y	1350	550	500	0	0	0	0.00246914	0	0	0	0	0	0	0	0	0	0	0	0	0	0	0	0	0	0
718	4	Y	1091	500	475	0	0.0030553	0	0	0	0	0	0	0	0.0030553	0	0	0	0	0	0	0	0	0	0	0	0.0030553
718	5	Y	1131	475	450	0	0	0	0.00294724	0	0	0	0	0	0	0	0	0	0	0	0	0	0	0	0	0	0
718	6	Y	1148	450	425	0	0.0116144	0	0.014518	0	0	0	0	0	0	0	0	0	0	0	0	0	0	0	0	0	0
718	7	Y	1147	425	400	0.00363267	0.0290613	0	0.021796	0	0	0	0	0	0	0	0	0	0	0	0	0	0	0	0	0	0
718	8	Y	1478	400	350	0.0067659	0.0744249	0	0.0338295	0	0	0	0	0.0067659	0	0.00338295	0	0	0	0	0	0	0	0	0	0	0.00338295
720	1	Y	844	650	600	0	0	0	0.189573	0	0	0	0	0	0	0	0	0	0	0	0	0	0	0	0	0	0
720	2	Y	1067	600	550	0	0	0	0.332709	0	0	0	0	0	0	0	0	0	0	0	0	0	0	0	0	0	0
720	3	Y	1194	550	500	0	0	0	0.31407	0	0	0	0	0	0	0	0	0	0	0	0	0	0	0	0	0	0
720	4	Y	1003	500	475	0	0.00498504	0	0.817547	0	0	0	0	0	0	0	0	0	0	0	0	0	0	0	0	0	0
720	5	Y	1133	475	450	0	0	0	0.59135	0	0	0	0	0	0	0	0	0	0	0	0	0	0	0	0	0	0
720	6	Y	886	450	425	0	0	0	1.11738	0	0	0	0	0	0	0	0	0	0	0	0	0	0	0	0	0	0
720	7	Y	1165	425	400	0	0	0	0.978541	0	0	0	0	0	0	0	0	0	0	0	0	0	0	0	0	0	0
720	8	Y	1062	400	350	0	0.0117702	0	0.541431	0	0.0117702	0	0	0	0	0	0	0	0	0	0.0117702	0	0	0	0	0	0
721	1	Y	1117	350	300	0	0.00406934	0	0.18719	0	0	0	0	0.00406934	0.00813868	0	0	0	0	0	0	0	0	0	0	0	0.00406934
721	2	Y	873	300	250	0	0.00381825	0	0.17564	0	0	0	0	0.00381825	0.0076365	0	0	0	0	0	0	0	0	0	0	0	0.00381825
721	3	Y	710	250	200	0	0.00469484	0	0.0187793	0	0	0	0	0	0.00469484	0	0	0	0	0	0	0	0	0	0	0	0.00938967
721	4	Y	966	200	150	0.00345066	0	0	0.0276052	0	0	0	0	0	0	0	0	0	0	0	0	0	0	0	0	0	0.00690131
721	5	Y	961	150	125	0.0346861	0	0	0	0	0.00578101	0	0	0.0289051	0	0.011562	0	0	0	0	0	0	0.00578101	0	0	0	0.011562
721	7	Y	1042	100	75	0	0.0524832	0	0.314899	0	0.104966	0	0	0.15745	0	0	0	0	0	0	0	0	0.0524832	0	0	0	0.15745
721	8	Y	1005	75	50	0.108831	0	0.217662	0.217662	0	0	0	0	4.5709	0	0	0	0	0	0	0	0	0	0	0	0	0.652985
721	9	Y	1287	50	0	0.0283282	0	0.0283282	0	0.113313	0.0283282	0	0	2.03963	0	0	0	0.0283282	0	0	0.0283282	0	0.0566563	0	0	0.0283282	0.0283282
722	1	Y	1499	350	300	0	0.00533689	0.00533689	0.0266845	0	0	0	0	0.00533689	0	0	0	0	0	0	0	0	0	0	0	0	0
722	2	Y	1018	300	250	0	0	0.0196464	0.0638507	0	0	0	0	0.00982318	0.00491159	0	0	0	0	0	0	0	0	0	0	0	0
722	3	Y	866	250	200	0	0	0.0115473	0.051963	0	0	0	0	0.0115473	0	0	0	0	0	0	0	0	0.00577367	0	0	0	0.00577367
722	4	Y	859	200	150	0	0	0.00698487	0.0628638	0	0	0	0	0.0279395	0	0	0	0	0	0	0	0	0	0	0	0	0.00698487
722	5	Y	786	150	125	0	0	0.00908761	0	0	0	0	0	0.00908761	0	0	0	0	0	0	0	0	0	0	0	0	0.0181752
722	6	Y	892	125	100	0.0093423	0	0.0093423	0	0	0.0186846	0.0093423	0	0.112108	0.0093423	0.0747384	0.0280269	0	0	0	0.0560538	0	0	0	0	0	0.0093423
724	3	Y	1179	425	425	0.00424088	0	0.00424088	0.0975403	0	0	0	0	0	0	0	0	0	0	0	0	0	0	0	0	0	0
724	4	Y	956	425	425	0	0	0	0.104603	0	0	0	0	0	0	0	0	0	0	0	0	0	0	0	0	0	0
725	1	Y	2407	1000	800	0.00415455	0	0	0	0	0	0	0	0	0	0	0	0	0	0	0	0	0	0	0	0	0
725	2	Y	1667	800	700	0	0	0	0.0089982	0	0	0	0	0	0	0	0	0	0	0	0	0	0	0	0	0	0
725	3	Y	1472	700	600	0.00339674	0	0	0	0	0.00339674	0	0	0	0	0	0	0	0	0	0	0	0	0	0	0	0
725	4	Y	1087	600	500	0	0	0.00459982	0	0	0	0	0	0.00919963	0	0	0	0	0	0	0	0	0	0	0	0	0
725	5	Y	850	500	400	0	0	0	0.0411765	0	0	0	0	0.00588235	0	0	0	0	0	0	0	0	0	0	0	0	0
725	6	Y	1122	400	300	0	0	0.00891266	0.0579323	0	0	0	0	0.00445633	0	0	0	0	0	0	0	0	0	0	0	0	0.00445633
725	7	Y	886	300	200	0	0	0	0.01693	0	0.0112867	0	0	0	0	0	0	0	0	0	0	0	0	0	0	0	0
725	8	Y	1088	200	100	0	0	0.0183824	0.183824	0.0275735	0.0551471	0	0	0.119485	0.00919118	0.00919118	0.00919118	0.0367647	0	0	0	0	0	0	0	0	0.0367647
725	9	Y	1161	100	0	0.757967	0	0.620155	0	0.482343	0.551249	0	0	5.99483	0	0.137812	0	0.137812	0	0	0	0	0.206718	0	0	0	2.13609
726	1	Y	950	425	430	0	0	0	0	0	0	0.266431	0	0	0	0	0	0	0	0	0	0	0	0	0	0	0
726	2	Y	804	430	428	0	0	0	0.178101	0	0	0	0	0.00125423	0	0	0	0.00627117	0	0.00125423	0	0	0	0	0	0	0.00250847
726	3	Y	904	428	434	0	0	0.00111549	0.551052	0	0.0100394	0	0	0.0133859	0	0	0	0	0	0	0	0	0	0	0	0	0
726	4	Y	1010	434	427	0	0	0.00100688	0.274878	0	0.00201376	0	0	0.0110757	0	0	0	0	0	0	0	0	0	0	0	0	0
726	5	Y	726	427	426	0	0	0	0.0798431	0	0.00560303	0	0	0.0168091	0	0	0	0	0	0	0	0	0	0	0	0	0
726	6	Y	1065	426	430	0	0	0.00859394	0.0697064	0.000954882	0.00763905	0	0	0.0143232	0	0	0	0	0	0	0.000954882	0	0	0	0	0.000954882	0.00477441
726	7	Y	990	430	435	0	0	0.00821777	0.0626605	0.00102722	0.00410888	0.00205444	0	0.0225989	0	0	0	0	0	0	0	0	0	0	0	0.00102722	0
726	8	Y	975	435	425	0	0	0.0135593	0.0573664	0	0.0135593	0	0	0.040678	0	0.00104302	0	0	0	0	0.00104302	0	0	0	0.00104302	0.00104302	0
716	1	N	2623	1000	800	0.00190621	0	0	0	0.00190621	0	0	0	0	0	0	0	0	0	0	0	0	0	0	0	0	0
716	2	N	905	800	700	0	0	0	0.00552486	0.00552486	0	0	0	0	0	0	0	0	0	0	0	0	0	0	0	0	0
716	3	N	1069	700	600	0	0	0	0.00467727	0.0280636	0	0	0	0.00467727	0	0	0	0	0	0	0	0.00467727	0	0	0	0	0
716	4	N	956	600	500	0	0	0.00523013	0	0.00523013	0	0	0	0.00523013	0	0	0	0	0	0	0	0	0	0	0	0	0.00523013
716	5	N	990	500	400	0.00505051	0	0.0252525	0.020202	0	0.00505051	0	0.00505051	0.010101	0	0	0	0	0	0	0	0	0	0	0	0	0.0151515
716	6	N	827	400	300	0	0	0.0362757	0.00604595	0.0181378	0.00604595	0	0	0	0	0	0	0	0	0.00604595	0	0	0	0	0	0	0.00604595
716	8	N	1041	200	100	0	0	0.00480307	0	0	0.00480307	0.00480307	0	0	0	0	0	0	0	0	0	0	0	0	0	0	0.00960615
716	9	N	1971	100	0	0	0	0	0	0.0117082	0.00780549	0.00780549	0	0.00780549	0	0	0.00780549	0.00390274	0	0	0.00390274	0	0	0	0	0	0.00780549
718	1	N	1281	650	600	0	0	0	0	0	0	0	0	0	0	0.00260213	0	0	0	0	0	0	0	0	0	0.00520427	0
718	2	N	1328	600	550	0	0	0	0	0	0	0	0	0	0	0	0	0	0	0	0.00251004	0	0	0	0	0	0
718	3	N	1350	550	500	0	0	0	0	0	0	0	0	0	0	0	0	0	0	0	0	0	0.00246914	0.00493827	0	0	0
718	4	N	1091	500	475	0	0.0030553	0.0030553	0.0091659	0	0	0	0	0.0061106	0	0	0	0	0	0	0	0	0	0	0	0.0030553	0.0091659
718	5	N	1131	475	450	0	0.011789	0.00294724	0	0	0	0	0	0	0	0.00294724	0	0	0	0	0	0	0	0	0	0	0.00884173
718	6	N	1148	450	425	0	0.0087108	0.0058072	0.0087108	0	0	0	0	0	0	0	0	0	0	0	0	0	0	0	0	0	0
718	7	N	1147	425	400	0.00363267	0.00363267	0	0.00363267	0.010898	0.00726533	0	0	0	0	0.00363267	0	0	0	0	0	0	0	0	0	0.00363267	0.00363267
718	8	N	1478	400	350	0	0	0.0101488	0	0	0.00338295	0	0	0	0	0	0	0	0	0	0	0	0	0	0	0	0.0202977
720	1	N	844	650	600	0	0	0	0.035545	0	0.0118483	0.00592417	0	0	0	0	0	0	0	0	0	0	0	0	0	0	0.00592417
720	2	N	1067	600	550	0	0	0	0.0281162	0	0	0.00937207	0	0	0	0.00468604	0	0	0	0	0	0	0	0	0	0	0.0140581
720	3	N	1194	550	500	0.0125628	0	0.00837521	0.00837521	0	0.020938	0	0	0	0	0	0	0	0	0	0.0041876	0	0	0	0	0	0
720	4	N	1003	500	475	0	0	0.00498504	0.0299103	0	0.0149551	0	0	0.00997009	0	0	0	0	0	0	0	0	0	0	0	0	0
720	5	N	1133	475	450	0	0	0	0.0176523	0	0.0176523	0	0	0.0176523	0	0	0	0	0	0	0	0	0.00882613	0	0	0	0.0264784
720	6	N	886	450	425	0	0	0	0.0112867	0	0.0112867	0	0	0	0	0.0112867	0	0	0	0	0	0	0.0112867	0	0	0	0
720	7	N	1165	425	400	0	0	0.00858369	0.0171674	0	0	0.00858369	0	0	0	0.00858369	0	0	0	0	0.00858369	0	0	0	0	0	0.0257511
720	8	N	1062	400	350	0	0	0.0117702	0	0	0.0235405	0.0117702	0	0.0235405	0	0	0	0	0	0	0.0117702	0	0.0117702	0	0	0	0.0353107
721	1	N	1117	350	300	0.024416	0	0.00406934	0.00406934	0.00406934	0	0	0	0.0203467	0	0	0	0	0	0	0	0	0	0	0	0.012208	0
721	2	N	873	300	250	0.0229095	0	0.00381825	0.00381825	0.00381825	0	0	0	0.0190913	0	0	0	0	0	0	0	0	0	0	0	0.0114548	0
721	3	N	710	250	200	0.0140845	0	0	0.0140845	0	0.00469484	0	0	0.0422535	0	0	0	0	0	0	0	0	0.00469484	0.00938967	0	0	0.0328639
721	4	N	966	200	150	0.0138026	0	0.00690131	0.00690131	0.00345066	0	0	0	0.0207039	0.00345066	0	0	0	0	0	0	0	0.0138026	0	0	0	0.0345066
721	5	N	961	150	125	0	0	0	0	0	0	0	0	0	0	0	0	0	0	0	0	0	0	0	0	0	0
721	7	N	1042	100	75	0.262416	0.0524832	0	0	0.0524832	0.104966	0	0	1.46953	0.0524832	0	0	0	0	0	0	0	0	0	0	0	0.15745
721	8	N	1005	75	50	0	0	0.108831	0	0	0	0	0	0.979478	0	0.108831	0	0	0	0	0	0	0	0	0	0	0.108831
721	9	N	1287	50	0	0	0	0.141641	0	0.0283282	0	0	0	0.283282	0	0	0	0	0	0	0	0	0.0283282	0	0	0	0
722	1	N	1499	350	300	0	0	0	0.0106738	0	0	0	0	0.0213476	0.00533689	0	0	0	0	0	0	0	0	0	0	0	0
722	2	N	1018	300	250	0.0196464	0	0.0147348	0	0	0	0	0	0.00491159	0.0147348	0	0	0	0	0	0	0	0	0	0	0	0.00982318
722	3	N	866	250	200	0.017321	0	0.00577367	0	0	0	0	0	0.0461894	0	0.0115473	0	0	0	0	0	0	0	0	0	0	0.0288684
722	4	N	859	200	150	0	0	0	0	0	0	0	0	0.0139697	0	0	0	0	0	0	0	0	0	0	0	0	0.0139697
722	5	N	786	150	125	0	0	0	0	0	0	0	0	0.0272628	0	0	0	0	0	0	0	0	0	0	0	0	0
722	6	N	892	125	100	0.0093423	0	0	0	0.0186846	0	0	0	0.0186846	0	0	0.0093423	0	0	0	0	0	0	0	0	0	0.0373692
722	7	N	757	100	75	0.010568	0	0	0	0	0	0	0	0.00528402	0	0	0	0	0	0	0	0	0	0	0	0	0
722	8	N	1085	75	50	0	0	0	0	0	0	0	0	0	0	0	0	0	0	0	0	0	0	0	0	0	0
724	3	N	1179	425	425	0.0212044	0	0.0127226	0.0254453	0.00424088	0.00424088	0.00424088	0.00848176	0	0	0	0	0	0	0	0	0	0	0	0	0	0
724	4	N	956	425	425	0	0	0.00523013	0.0261506	0	0	0	0	0	0	0	0	0	0	0	0	0	0	0	0	0	0
725	1	N	2407	1000	800	0.0249273	0	0	0.00207727	0	0	0.00207727	0	0	0	0	0	0	0	0	0	0	0	0	0	0	0.00415455
725	2	N	1667	800	700	0.0179964	0	0	0.0029994	0	0.0119976	0	0	0	0	0	0	0	0	0	0	0	0	0	0	0	0.0059988
725	3	N	1472	700	600	0.0305707	0	0.00339674	0.0101902	0	0.00679348	0.00339674	0.0101902	0.00339674	0.00339674	0	0	0	0	0	0	0	0	0	0	0	0.00339674
725	4	N	1087	600	500	0.0183993	0	0.0183993	0.0183993	0.00459982	0	0	0	0.0183993	0.00459982	0	0	0	0	0	0	0	0	0	0	0	0
725	5	N	850	500	400	0.0176471	0	0.0352941	0.0176471	0	0.0117647	0.00588235	0.0117647	0.0294118	0	0	0	0	0	0	0	0	0	0	0	0	0.00588235
725	6	N	1122	400	300	0	0	0.0891266	0.00891266	0	0.00445633	0	0.040107	0.0356506	0	0	0	0	0	0	0	0	0	0	0	0	0.00445633
725	7	N	886	300	200	0	0	0.01693	0.01693	0.0225734	0.03386	0.00564334	0	0.0282167	0	0	0	0	0	0	0	0	0	0	0	0	0.01693
725	8	N	1088	200	100	0.00919118	0	0.183824	0.0735294	0.00919118	0.0551471	0	0.00919118	0.193015	0	0	0	0	0.00919118	0	0	0	0	0	0	0	0.193015
725	9	N	1161	100	0	0	0	0.206718	0	0.0689061	0	0	0.0689061	0.895779	0	0	0	0	0	0	0	0	0	0	0	0	0
726	1	N	950	425	430	0	0	0.00212295	0.024414	0.0106148	0.00318443	0.00318443	0.0159222	0.0169836	0.00318443	0	0	0.00212295	0	0	0.00106148	0	0.00106148	0.00212295	0	0	0
726	2	N	804	430	428	0.0037627	0	0.00250847	0.0075254	0.0112881	0.00125423	0	0	0.0250847	0	0	0	0.00125423	0	0	0.00125423	0	0	0.00125423	0	0	0
726	3	N	904	428	434	0.00111549	0	0.00557745	0.0122704	0.0167324	0.0301182	0.00111549	0	0.0669294	0.00557745	0	0	0	0	0.00223098	0.00446196	0.00334647	0.00780843	0	0	0	0
726	4	N	1010	434	427	0.00100688	0	0.00906192	0.0050344	0.0120826	0.0161101	0	0	0.132908	0.00201376	0	0	0	0	0	0	0	0	0	0.00100688	0.00100688	0.00604128
726	5	N	726	427	426	0	0	0.00280151	0.00280151	0.00700378	0.00420227	0.00140076	0	0.0714386	0	0	0	0.00420227	0	0	0	0	0	0	0	0	0.00140076
726	6	N	1065	426	430	0.000954882	0	0.0133683	0.00286465	0.0219623	0.023872	0.00477441	0	0.122225	0	0	0	0.00190976	0	0.00190976	0.000954882	0	0	0	0	0	0.00763905
726	7	N	990	430	435	0.00102722	0	0.00616333	0.00924499	0.0338983	0.0410889	0.00102722	0	0.11813	0.00102722	0	0	0	0	0.00102722	0	0.00102722	0	0	0	0	0.00924499
726	8	N	975	435	425	0.00312907	0	0.0125163	0.00938722	0.040678	0.0448501	0	0	0.114733	0.00312907	0	0.00104302	0	0	0.00625815	0	0.00312907	0	0	0	0.00104302	0.0114733
